# Supplementary material for: Correlation of multimodal 18F-DOPA PET and conventional MRI with treatment response and survival in children with diffuse intrinsic pontine gliomas
Source: PubMed Central journal article supplement (PMC7667677; doi:10.7150/thno.50598), 2020-10-25
Supplement: thnov10p11881s1.pdf [file thnov10p11881s1.pdf]

**Table S1.** Detailed report of patient characteristics, imaging findings and survival

| Case | Age at diagnosis | Sex | Histological and molecular diagnosis | Ring enhancement (Y/N) | T/S  | T/N  | Pre-treatment MRI tumor volume (cc) | Pre-treatment PET tumor volume (cc) | Post-treatment MRI tumor volume (cc) | OS |
|------|------------------|-----|--------------------------------------|------------------------|------|------|-------------------------------------|-------------------------------------|--------------------------------------|----|
| 1    | 3                | M   | AA, H3K27M-m                         | N                      | 1.50 | 2.20 | 18.58                               | 17.20                               | 17.90                                | 5  |
| 2    | 3                | F   | ND                                   | N                      | 0.24 | 0.47 | 34.03                               | no increased uptake                 | 11.49                                | 18 |
| 3    | 4                | F   | ND                                   | Y                      | 1.09 | 2.09 | 40.00                               | 21.00                               | 28.90                                | 9  |
| 4    | 5                | M   | ND                                   | N                      | 1.24 | 1.76 | 27.21                               | 7.50                                | 16.00                                | 10 |
| 5    | 5                | F   | ND                                   | Y                      | 1.10 | 1.71 | 22.78                               | 5.00                                | 21.25                                | 10 |
| 6    | 5                | F   | ND                                   | N                      | 0.93 | 1.62 | 25.03                               | 8.00                                | 11.27                                | 28 |
| 7    | 6                | F   | GB, H3K27M-m                         | Y                      | 1.55 | 2.85 | 46.35                               | 29.00                               | 32.00                                | 8  |
| 8    | 6                | F   | ND                                   | N                      | 1.06 | 1.89 | 21.80                               | 0,86                                | 11.18                                | 12 |
| 9    | 6                | F   | ND                                   | N                      | 0.55 | 0.95 | 55.63                               | no increased uptake                 | 20.54                                | 17 |
| 10   | 7                | F   | AA, H3K27M-m                         | N                      | 1.48 | 2.73 | 27.64                               | 22.00                               | 22.12                                | 6  |
| 11   | 7                | M   | AA, H3K27M-m                         | N                      | 1.27 | 2.18 | 34.06                               | 25.00                               | 33.70                                | 10 |
| 12   | 7                | M   | GB, H3K27M-m                         | Y                      | 1.10 | 1.91 | 24.03                               | 21.00                               | 22.00                                | 10 |
| 13   | 7                | F   | ND                                   | N                      | 0.70 | 1.10 | 25.06                               | 4.00                                | 8.35                                 | 16 |
| 14   | 7                | M   | DA, H3K27M-wt                        | N                      | 0.45 | 0.75 | 45.00                               | no increased uptake                 | 16.00                                | 38 |
| 15   | 8                | M   | AA, H3K27M-wt                        | N                      | 0.44 | 0.67 | 31.46                               | no increased uptake                 | 7.00                                 | 27 |
| 16   | 9                | F   | AA, H3K27M-m                         | N                      | 1.22 | 2.49 | 26.69                               | 13,91                               | 15.08                                | 12 |
| 17   | 10               | M   | GB, H3K27M-m                         | Y                      | 2.32 | 3.78 | 46.00                               | 31.00                               | 42.00                                | 6  |
| 18   | 10               | F   | GB, H3K27M-m                         | N                      | 1.73 | 2.52 | 27.77                               | 8,61                                | 26.00                                | 9  |
| 19   | 10               | F   | ND                                   | Y                      | 1.70 | 2.89 | 26.00                               | 18.00                               | 20.00                                | 6  |

OS overall survival, M male, F female, DA diffuse astrocytoma, AA anaplastic astrocytoma, GB glioblastoma, wt wildtype, m mutant, ND not done, Y yes, N no
